# Supplementary material for: Lipid nanoparticle mRNA systems containing high levels of sphingomyelin engender higher protein expression in hepatic and extra-hepatic tissues
Source: PubMed Central journal article supplement — Mol Ther Methods Clin Dev. 2023 Jun 12;30:235–45. doi: 10.1016/j.omtm.2023.06.005 (PMC10410000; doi:10.1016/j.omtm.2023.06.005), 2023-06-12
Supplement: mmc1.pdf [file mmc1.pdf]

OMTM, Volume 30

## **Supplemental information**

**Lipid nanoparticle mRNA systems containing high  
levels of sphingomyelin engender higher protein  
expression in hepatic and extra-hepatic tissues**

**Nisha Chander, Gene Basha, Miffy Hok Yan Cheng, Dominik Witzigmann, and Pieter R. Cullis**

## Supplemental Information

**Table S1.** LNP luc mRNA systems containing high ESM helper lipid contents can be formulated using ethanol dilution/rapid mixing techniques and exhibit high mRNA encapsulation efficiencies and low polydispersity indices.

| Sample | Lipid composition (mol%) |             |                    |         | %EE      | Sizing data |      |
|--------|--------------------------|-------------|--------------------|---------|----------|-------------|------|
|        | MC3                      | Cholesterol | Helper lipid (ESM) | Peg DMG |          | Number (nm) | PDI  |
| ESM-10 | 50                       | 38.5        | 10                 | 1.5     | 98 ± 1.1 | 52 ± 3.9    | 0.04 |
| ESM-20 | 44.25                    | 34.25       | 20                 | 1.5     | 96 ± 2.0 | 48 ± 2.1    | 0.11 |
| ESM-30 | 38.5                     | 30          | 30                 | 1.5     | 95 ± 2.1 | 47 ± 2.7    | 0.09 |
| ESM-40 | 33                       | 25.5        | 40                 | 1.5     | 97 ± 1.1 | 44 ± 1.6    | 0.08 |
| ESM-50 | 27.25                    | 21.25       | 50                 | 1.5     | 88 ± 4.2 | 52 ± 4.2    | 0.10 |
| ESM-55 | 24.5                     | 19          | 55                 | 1.5     | 53 ± 3.1 | 69 ± 2.2    | 0.19 |

**Table S2.** Formulation at 10% and 40% DSPC as helper content at the expense of ionizable lipid and cholesterol (keeping the ionizable lipid/cholesterol ratio constant) on mRNA encapsulation efficiencies and LNP size.

| Sample  | Lipid composition (mol%) |             |                     |         | %EE      | Sizing data |      |
|---------|--------------------------|-------------|---------------------|---------|----------|-------------|------|
|         | MC3                      | Cholesterol | Helper lipid (DSPC) | Peg DMG |          | Number (nm) | PDI  |
| DSPC-10 | 50                       | 38.5        | 10                  | 1.5     | 99 ± 1.2 | 54 ± 2.1    | 0.09 |
| DSPC-40 | 33                       | 25.5        | 40                  | 1.5     | 97 ± 2.2 | 43 ± 2.0    | 0.09 |

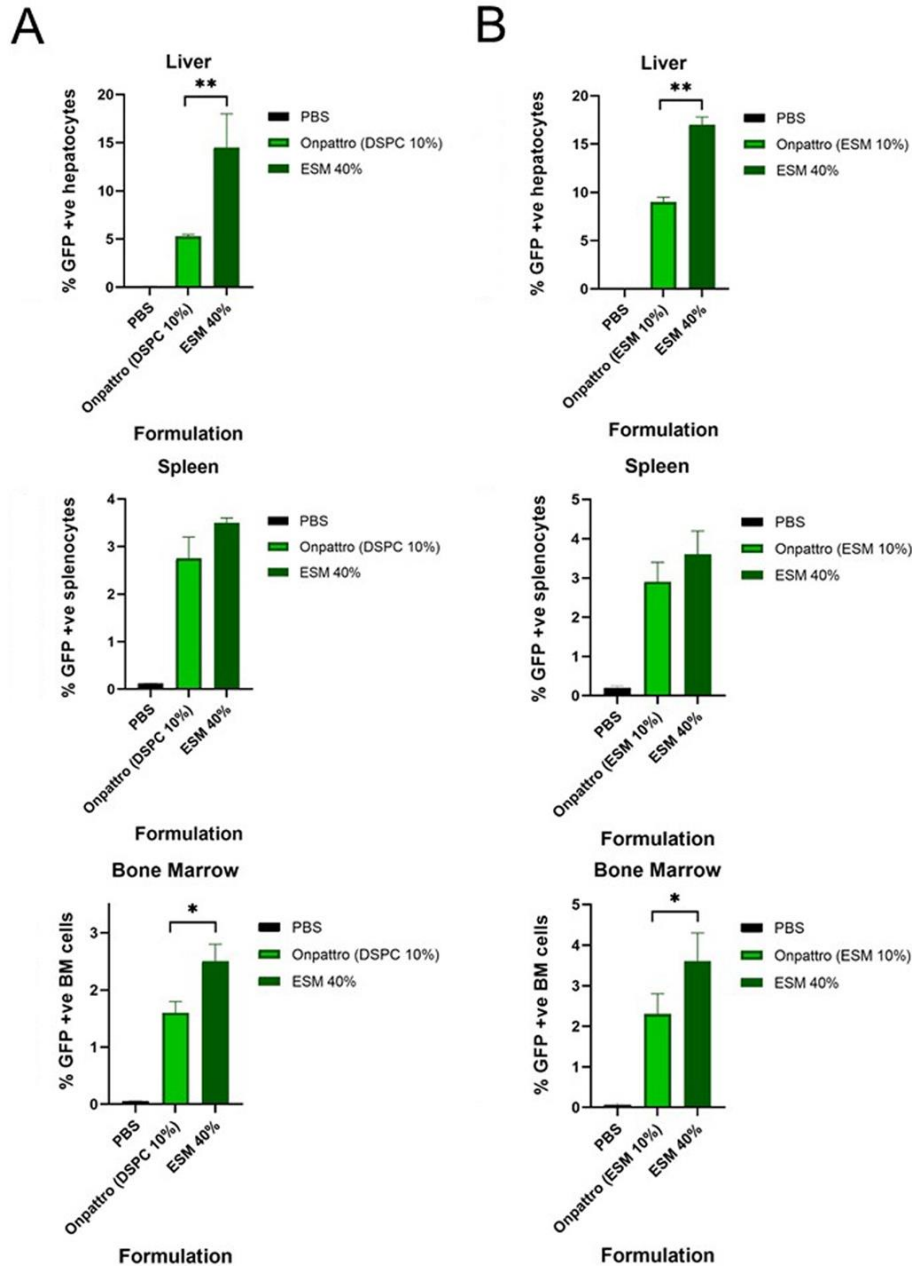

**Figure S1. LNP GFP mRNA systems containing 40 mol% ESM exhibit superior gene expression in target organs at 4 h post-injection as compared to systems containing 10 mol% DSPC or ESM.**

C57Bl6 mice were divided into 2 groups and received intravenous (i.v.) injection of GFP mRNA delivered with LNPs based on Onpattro formulation comprising 10 mol% DSPC or 10 mol% ESM, and 40% ESM including PBS as a negative control. LNPs entrapping GFP mRNA were labelled with 0.2 mol% DiD as fluorescent lipid marker. Mice received 3 mg/kg mRNA and 4 hrs post injection, phenotypic detection of hepatocytes was performed and cellular uptake and GFP expression was detected in hepatocytes, splenocytes and bone marrow cells. LNP-mRNA delivery or transfection efficacy were assessed based on the relative mean fluorescence intensity of DiD<sup>+ve</sup> or GFP<sup>+ve</sup> cells, respectively, measured on histograms obtained from gated cell populations. A:

Flow cytometry data indicating GFP expression in indicated tissues 4 hour post injection following administration of DSPC 10% and 40% ESM and **B**: ESM 10% and 40% ESM. Bar graphs represent the arithmetic mean  $\pm$  SD of the percentage of GFP<sup>+</sup>ve cells. BM: bone marrow. \* P<0.05; \*\*P<0.01.

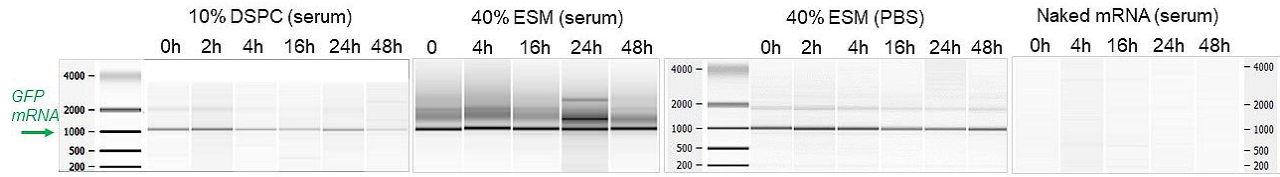

**Figure S2.**

Image of an Agilent Bioanalyzer gel showing the mRNA integrity through the migration following incubation of GFP-mRNA encapsulated in 10% DSPC (MC3-50%) and 40% ESM (MC3-33%) in 50% fetal bovine serum (FBS) at indicated times. Naked GFP-mRNA and 40% ESM (MC3-33%) were incubated in 50% FBS and PBS respectively and acted as controls. mRNA integrity was determined by automated electrophoresis using Agilent 2100 Bioanalyzer. The data are representative of 2 different experiments.

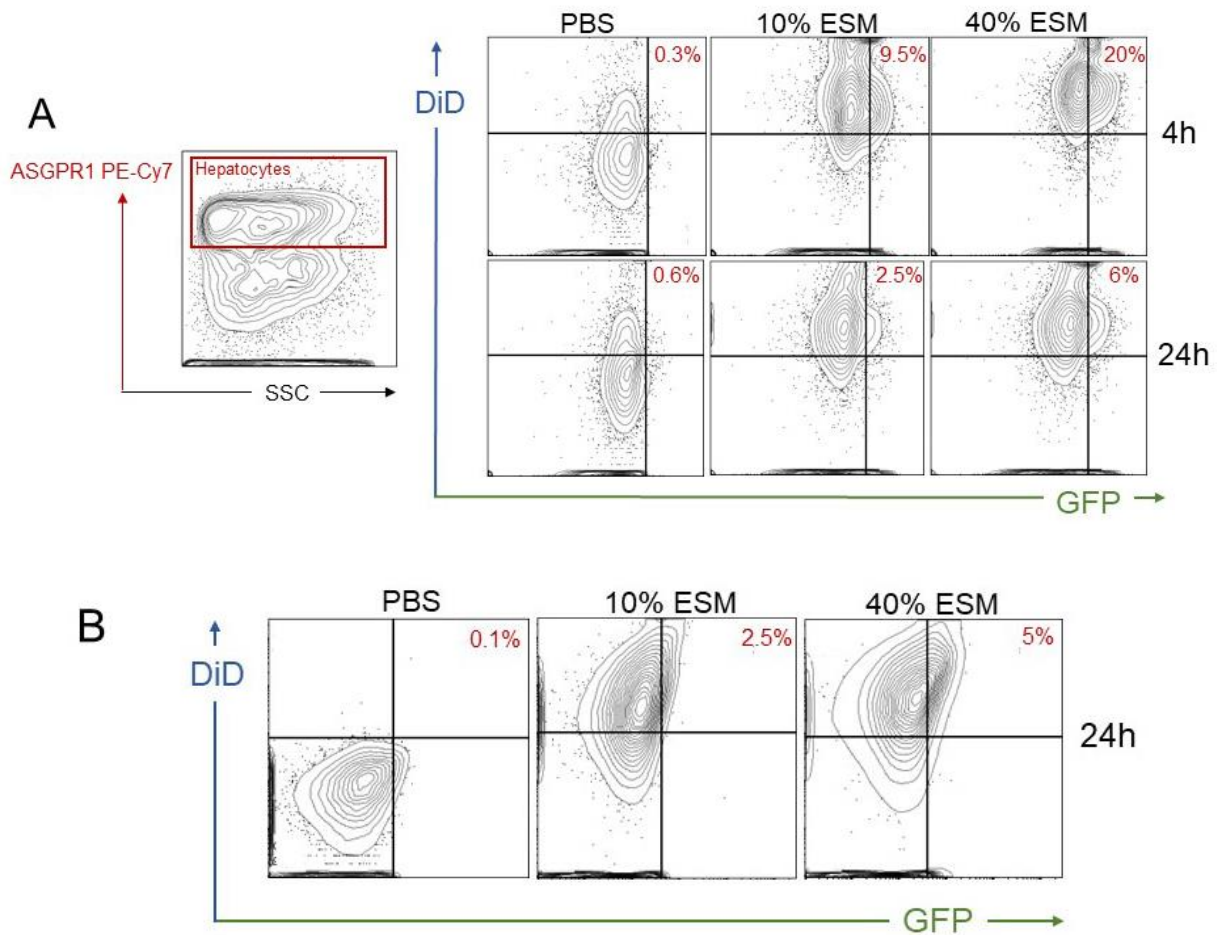

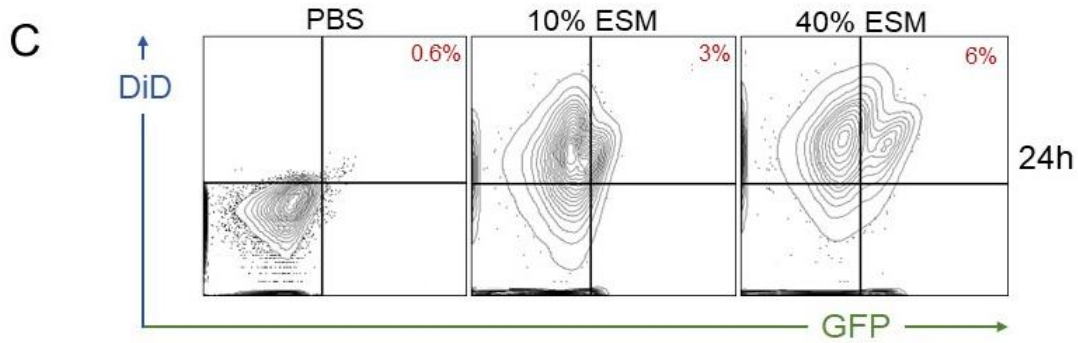

**Figure S3.** Contour plots display the percentage of (A) DiD<sup>+</sup> hepatocytes and DiD<sup>+</sup>/GFP<sup>+</sup> hepatocytes indicating LNP uptake and GFP translation in DiD<sup>+</sup> cells as determined by co-expression of DiD and GFP. (B) LNP transfection efficiency and GFP translation in DiD<sup>+</sup> splenocytes. The 24 hr time point only is shown. (C) LNP transfection efficiency and GFP translation in DiD<sup>+</sup> bone marrow cells. The 24 hr time point only is shown.

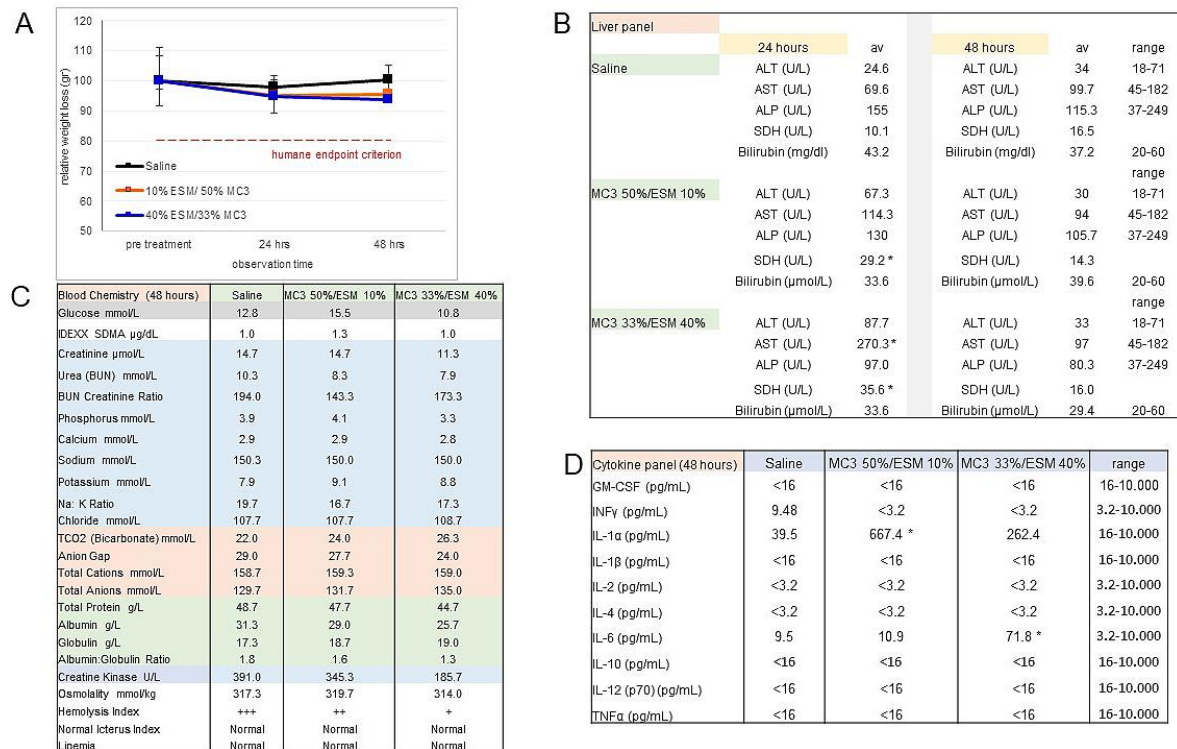

**Figure S4.** Blood chemistry and cytokine multiplex panel analysis measured after a single dose regimen of 3.0 mg/kg LNP-mRNA intravenously. The data show the weight monitoring (A), the analytes measured that include biomarkers of liver health (B), blood chemistry (C) and the multiplex cytokine panel. Measures were taken from serum harvested via saphenous bleeding and cardiac puncture performed on animals during the observation period and following euthanasia 48 hours post iv administration of Onpattro-based and new LNP-mRNA formulations including saline control. The dose was given at 3.0 mg of LNP-mRNA per kg of animal body weight. Results reflect the mean of three replicate animals  $\pm$  SD. \*: P<0.05.
